# Supplementary material for: Chemometrics strategy coupled with high resolution mass spectrometry for analyzing and interpreting comprehensive metabolomic characterization of hyperlipemia
Source: Royal Society of Chemistry journal article supplement (doi:10.1039/c6ra24267g), 2016-01-01
Supplement: c6ra24267g1.pdf [file c6ra24267g1.pdf]

Table S1. Hyperlipidemia diagnose rules which formulated by China Adult Dyslipidemia Prevention Guide  
 formulate joint committee and American National Cholesterol Education Program.

| Hierarchy    | TC                                | LDL                               | HDL                  | TG                                |
|--------------|-----------------------------------|-----------------------------------|----------------------|-----------------------------------|
| Proper Range | <5.18<br>mmol/L(200mg/dl)         | <3.37mmol/L(130mg/dl)             | ≥1.04mmol/L(40mg/dl) | <1.70mmol/L(150mg/dl)             |
| Verge Level  | 5.18~6.19mmol/L(200<br>~239mg/dl) | 3.37~4.12mmol/L(130~15<br>9mg/dl) | -                    | 1.70~2.25mmol/L(150~19<br>9mg/dl) |
| Increase     | ≥6.22mmol/L(240mg/<br>dl)         | ≥4.14mmol/L(160mg/dl)             | ≥1.55mmol/L(60mg/dl) | ≥2.26mmol/L(200mg/dl)             |
| Decrease     | -                                 | -                                 | <1.04mmol/L(40mg/dl) | -                                 |

Table S2. The basic information of hyperlipidemia patient

| NO. | Gender | Age | Diagnosis                                                                                                                                                            |
|-----|--------|-----|----------------------------------------------------------------------------------------------------------------------------------------------------------------------|
| 1   | Female | 64  | 1.Hyperlipidemia<br>2.Coronary atherosclerotic cardiopathy 3.Unstable angina pectoris<br>4.Hypertension(extremely high-risk groups)                                  |
| 2   | Female | 80  | 1. Hyperlipidemia<br>2.Hypertension(extremely high-risk groups)<br>3.Chronic renal insufficiency<br>4. Coronary atherosclerotic cardiopathy                          |
| 3   | Female | 67  | 1. Hyperlipidemia<br>2.Hypertension(extremely high-risk groups)<br>3. Coronary atherosclerotic cardiopathy                                                           |
| 4   | Female | 78  | 1. Hyperlipidemia<br>2.Coronary atherosclerotic cardiopathy 3.Unstable angina<br>4.Hypertension(extremely high-risk groups)<br>5. Arrhythmia and Atrial fibrillation |
| 5   | Male   | 61  | 1. Hyperlipidemia<br>2. Atrial flutter<br>3. Hypertension(high-risk groups)<br>4.Chronic renal insufficiency                                                         |
| 6   | Male   | 69  | 1. Hyperlipidemia<br>2. Arrhythmia and Atrial fibrillation<br>3.Bronchial asthma<br>4. Coronary atherosclerotic cardiopathy<br>5.Hyperuricemia                       |
| 7   | Female | 48  | 1. Hyperlipidemia<br>2.Coronary atherosclerotic cardiopathy<br>3. Hypertension(extremely high-risk groups)<br>4. Arrhythmia and Atrial fibrillation                  |
| 8   | Male   | 77  | 1. Hyperlipidemia<br>2. Coronary atherosclerotic cardiopathy                                                                                                         |
| 9   | Male   | 69  | 1. Hyperlipidemia<br>2. Arrhythmia and Atrial fibrillation<br>3.Bronchial asthma<br>4.Hyperuricemia                                                                  |
| 10  | Male   | 80  | 1. Hyperlipidemia<br>2.Coronary atherosclerotic cardiopathy<br>3.Hypertension(extremely high-risk groups)<br>4. Chronic cardiac failure                              |
| 11  | Female | 68  | 1. Hyperlipidemia<br>2.Coronary atherosclerotic cardiopathy<br>3.Hypertension(extremely high-risk groups)<br>4.Type 2 Diabetes<br>5. Acute pancreatitis              |
| 12  | Female | 73  | 1. Hyperlipidemia<br>2.Coronary atherosclerotic cardiopathy<br>3.Hypertension(extremely high-risk groups)<br>4.Type 2 Diabetes                                       |

|    |        |    |                                                                                                                                                                                                        |
|----|--------|----|--------------------------------------------------------------------------------------------------------------------------------------------------------------------------------------------------------|
| 13 | Female | 77 | 5. Cardiac failure<br>1. Hyperlipidemia<br>2. Coronary atherosclerotic cardiopathy                                                                                                                     |
| 14 | Male   | 80 | 1. Hyperlipidemia<br>2. Hypertension (extremely high-risk groups)                                                                                                                                      |
| 15 | Male   | 60 | 1. Hyperlipidemia<br>2. Coronary atherosclerotic cardiopathy<br>3. Hypertension (extremely high-risk groups)<br>4. Arrhythmia and Atrial fibrillation                                                  |
| 16 | Female | 69 | 1. Hyperlipidemia<br>2. Hypertension (extremely high-risk groups)<br>3. Coronary atherosclerotic cardiopathy<br>4. Chronic renal insufficiency                                                         |
| 17 | Male   | 65 | 1. Hyperlipidemia<br>2. Type 2 Diabetes<br>3. Coronary atherosclerotic cardiopathy                                                                                                                     |
| 18 | Female | 75 | 1. Hyperlipidemia<br>2. Arrhythmia Atrial premature beats<br>3. Fleshy cardiomyopathy<br>4. Hypertension (extremely high-risk groups)<br>5. Type 2 Diabetes<br>6. Coronary atherosclerotic cardiopathy |
| 19 | Male   | 77 | 1. Hyperlipidemia<br>2. Arrhythmia and Atrial fibrillation<br>3. Hypoproteinemia<br>4. Coronary atherosclerotic cardiopathy<br>5. Hyperuricemia                                                        |
| 20 | Female | 66 | 1. Hyperlipidemia<br>2. Arrhythmia<br>3. Hypertension<br>4. Coronary atherosclerotic cardiopathy<br>5. Type 2 Diabetes                                                                                 |
| 21 | Female | 74 | 1. Hyperlipidemia<br>2. Hypertension (extremely high-risk groups)<br>3. Coronary atherosclerotic cardiopathy<br>4. Chronic renal insufficiency                                                         |
| 22 | Female | 77 | 1. Hyperlipidemia<br>2. Coronary atherosclerotic cardiopathy<br>3. Hypertension (high-risk groups)<br>4. Cervical spondylosis                                                                          |
| 23 | Male   | 71 | Hyperlipidemia                                                                                                                                                                                         |
| 24 | Female | 80 | 1. Hyperlipidemia<br>2. Hypertension (extremely high-risk groups)<br>3. Type 2 Diabetes<br>4. Coronary atherosclerotic cardiopathy<br>5. Arrhythmia and Atrial fibrillation                            |
| 25 | Female | 56 | 1. Hyperlipidemia<br>2. Chronic renal insufficiency<br>3. Hypertension (extremely high-risk groups)                                                                                                    |

|    |        |    |                                                                                                                                                    |
|----|--------|----|----------------------------------------------------------------------------------------------------------------------------------------------------|
| 26 | Male   | 79 | 1. Hyperlipidemia<br>2. Coronary atherosclerotic                                                                                                   |
| 27 | Male   | 80 | 1. Hyperlipidemia<br>2.Type 2 Diabetes<br>3.Arrhythmia and Atrial fibrillation<br>4. Coronary atherosclerotic cardiopathy                          |
| 28 | Female | 79 | 1. Hyperlipidemia<br>2.Arrhythmia and Atrial fibrillation<br>3.Hypertension(extremely high-risk groups)<br>4. Coronary atherosclerotic cardiopathy |
| 29 | Female | 78 | 1. Hyperlipidemia<br>2.Hypertension(extremely high-risk groups)<br>3. Coronary atherosclerotic cardiopathy<br>4.Type 2 Diabetes                    |
| 30 | Female | 59 | 1. Hyperlipidemia<br>2.Hypertension<br>3.Diabetes<br>4. Coronary heart disease                                                                     |
| 31 | Female | 55 | 1. Hyperlipidemia<br>2.Hypertension<br>3. Coronary heart disease                                                                                   |
| 32 | Female | 79 | 1. Hyperlipidemia<br>2.Hypertension<br>3.Diabetes<br>4. Coronary heart disease                                                                     |
| 33 | Male   | 60 | 1. Hyperlipidemia<br>2.Hypertension<br>3.Diabetes<br>4. Coronary heart disease                                                                     |
| 34 | Female | 45 | 1. Coronary heart disease<br>2.Hyperlipidemia                                                                                                      |
| 35 | Male   | 62 | 1. Hyperlipidemia<br>2. Coronary heart disease                                                                                                     |
| 36 | Female | 52 | 1. Hyperlipidemia<br>2.Unstable angina<br>3. Coronary heart disease                                                                                |
| 37 | Male   | 66 | 1. Hyperlipidemia<br>2.Hypertension (extremely high-risk groups)<br>3. Coronary heart disease                                                      |
| 38 | Female | 64 | 1. Hyperlipidemia<br>2.Hypertension (extremely high-risk groups)<br>3. Coronary heart disease                                                      |
| 39 | Female | 61 | 1. Hyperlipidemia<br>2.Unstable angina<br>3.Hypertension (extremely high-risk groups)<br>4. Coronary heart disease                                 |
| 40 | Female | 58 | 1. Hyperlipidemia<br>2. Coronary heart disease                                                                                                     |

|    |        |    |                                                                                                                    |
|----|--------|----|--------------------------------------------------------------------------------------------------------------------|
| 41 | Male   | 57 | 1. Hyperlipidemia<br>2.Hypertension (extremely high-risk groups)<br>3. Coronary heart disease<br>4.Fatty liver     |
| 42 | Female | 73 | 1. Hyperlipidemia<br>2. Coronary heart disease                                                                     |
| 43 | Male   | 65 | 1. Coronary heart disease<br>2.Type 2 Diabetes<br>3.Hyperlipidemia                                                 |
| 44 | Female | 57 | 1. Hyperlipidemia<br>2. Coronary heart disease                                                                     |
| 45 | Male   | 59 | 1. Hyperlipidemia<br>2. Coronary heart disease<br>3.Fatty liver<br>4.Hypertension (extremely high-risk groups)     |
| 46 | Female | 51 | 1. Hyperlipidemia<br>2.Arrhythmia<br>3.Sinus bradycardia<br>4. Coronary heart disease<br>5.Type 2 Diabetes         |
| 47 | Female | 69 | 1. Hyperlipidemia<br>2.Hypertension (extremely high-risk groups)<br>3.Type 2 Diabetes<br>4. Coronary heart disease |
| 48 | Female | 78 | 1. Hyperlipidemia<br>2.Unstable angina<br>3.Hypertension (extremely high-risk groups)<br>4. Coronary heart disease |
| 49 | Male   | 61 | 1. Hyperlipidemia<br>2.Hypertension (extremely high-risk groups)<br>3. Coronary heart disease                      |
| 50 | Female | 61 | 1. Hyperlipidemia<br>2. Coronary heart disease                                                                     |
| 51 | Female | 51 | 1. Hyperlipidemia<br>2.unstable angina pectoris<br>3. Coronary heart disease<br>4.Cervical spondylosis             |
| 52 | Female | 74 | 1. Hyperlipidemia<br>2.Hypertension (extremely high-risk groups)<br>3. Coronary heart disease                      |
| 53 | Male   | 71 | 1. Hyperlipidemia<br>2. Coronary heart disease                                                                     |
| 54 | Female | 52 | 1. Hyperlipidemia<br>2.Arrhythmia<br>3.Sinus bradycardia<br>4. Coronary heart disease<br>5.Fatty liver             |
| 55 | Female | 56 | 1. Hyperlipidemia                                                                                                  |

|    |        |    |                                                                                                                                                                                                                                                                                                                                                                                                                      |
|----|--------|----|----------------------------------------------------------------------------------------------------------------------------------------------------------------------------------------------------------------------------------------------------------------------------------------------------------------------------------------------------------------------------------------------------------------------|
| 56 | Female | 74 | <ul style="list-style-type: none"> <li>2.Hypertension (extremely high-risk groups))</li> <li>3. Coronary heart disease               <ul style="list-style-type: none"> <li>1. Hyperlipidemia</li> </ul> </li> </ul>                                                                                                                                                                                                 |
| 57 | Male   | 61 | <ul style="list-style-type: none"> <li>2.Hypertension (extremely high-risk groups))</li> <li>3. Coronary heart disease               <ul style="list-style-type: none"> <li>1. Hyperlipidemia</li> </ul> </li> <li>2. Coronary heart disease</li> </ul>                                                                                                                                                              |
| 58 | Male   | 77 | <ul style="list-style-type: none"> <li>1. Hyperlipidemia</li> <li>2.Hypertension (extremely high-risk groups))</li> <li>3. Coronary heart disease               <ul style="list-style-type: none"> <li>1. Hyperlipidemia</li> </ul> </li> </ul>                                                                                                                                                                      |
| 59 | Male   | 72 | <ul style="list-style-type: none"> <li>2.Hypertension (extremely high-risk groups))</li> <li>3. Coronary heart disease               <ul style="list-style-type: none"> <li>1. Hyperlipidemia</li> <li>2.Arrhythmia</li> </ul> </li> <li>3.Hypertension (extremely high-risk groups))</li> <li>4. Coronary heart disease               <ul style="list-style-type: none"> <li>5.Hyperuricemia</li> </ul> </li> </ul> |
| 60 | Female | 53 | <ul style="list-style-type: none"> <li>1. Hyperlipidemia</li> <li>2.unstable angina pectoris               <ul style="list-style-type: none"> <li>3.Arrhythmia</li> </ul> </li> <li>4.Hypertension (extremely high-risk groups))</li> <li>5. Coronary heart disease               <ul style="list-style-type: none"> <li>1. Hyperlipidemia</li> <li>2.Type 2 Diabetes</li> </ul> </li> </ul>                         |
| 61 | Female | 58 | <ul style="list-style-type: none"> <li>3. Coronary heart disease</li> <li>1. Hyperlipidemia</li> <li>2.Type 2 Diabetes</li> <li>3. Coronary heart disease</li> </ul>                                                                                                                                                                                                                                                 |
| 62 | Female | 70 | <ul style="list-style-type: none"> <li>1. Hyperlipidemia</li> <li>2.Hypertension (extremely high-risk groups))</li> <li>3.Type 2 Diabetes</li> <li>4. Coronary heart disease</li> </ul>                                                                                                                                                                                                                              |
| 63 | Female | 76 | <ul style="list-style-type: none"> <li>1. Hyperlipidemia</li> <li>2.Hypertension (extremely high-risk groups))</li> <li>3. Coronary heart disease               <ul style="list-style-type: none"> <li>4.Type 2 Diabetes</li> </ul> </li> </ul>                                                                                                                                                                      |
| 64 | Male   | 65 | <ul style="list-style-type: none"> <li>1. Hyperlipidemia</li> <li>2.Hypertension               <ul style="list-style-type: none"> <li>3.Diabetes</li> </ul> </li> <li>4. Coronary heart disease</li> </ul>                                                                                                                                                                                                           |
| 65 | Female | 42 | <ul style="list-style-type: none"> <li>1. Hyperlipidemia</li> <li>2. Coronary heart disease</li> </ul>                                                                                                                                                                                                                                                                                                               |
| 66 | Female | 51 | <ul style="list-style-type: none"> <li>1. Hyperlipidemia</li> <li>2.Hypertension (extremely high-risk groups))</li> <li>3.Type 2 Diabetes</li> <li>4. Coronary heart disease</li> </ul>                                                                                                                                                                                                                              |
| 67 | Male   | 61 | <ul style="list-style-type: none"> <li>1. Hyperlipidemia</li> <li>2.Hypertension (extremely high-risk groups))</li> <li>3.Type 2 Diabetes</li> <li>4. Coronary heart disease</li> </ul>                                                                                                                                                                                                                              |
| 68 | Male   | 79 | <ul style="list-style-type: none"> <li>1. Hyperlipidemia</li> <li>2.Hypertension (extremely high-risk groups))</li> <li>3. Coronary heart disease</li> </ul>                                                                                                                                                                                                                                                         |

|    |        |    |                                                                               |
|----|--------|----|-------------------------------------------------------------------------------|
| 69 | Male   | 44 | 1. Hyperlipidemia<br>2. Coronary heart disease<br>3. Cervical spondylosis     |
| 70 | Female | 68 | 1. Hyperlipidemia<br>2. Coronary heart disease<br>3. unstable angina pectoris |
| 71 | Female | 79 | 1. Hyperlipidemia<br>2. Hypertension (extremely high-risk groups)             |

---

Table S3. UPLC-MS identification of potential serum biomarkers in hyperlipidemia patients.

| NO. | Metabolite name                                                                                  | Rt   | m/z      | Molecular Formula | mDa  | [M+H]/[M-H]        | Trend |
|-----|--------------------------------------------------------------------------------------------------|------|----------|-------------------|------|--------------------|-------|
| 1   | 1-(sn-glycero-3-phospho)-<br>1d-myo-inositol                                                     | 0.47 | 333.0588 | C9H19O11P         | 0.0  | [M-H] <sup>-</sup> | ↑**   |
| 2   | Gamma-Glutamyl-beta-cyanoalanine                                                                 | 0.51 | 242.0804 | C9H13N3O5         | 1.0  | [M-H] <sup>-</sup> | ↑**   |
| 3   | Uric acid                                                                                        | 0.65 | 167.0220 | C5H4N4O3          | -0.2 | [M-H] <sup>-</sup> | ↑**   |
| 4   | Beta-D-Galactose                                                                                 | 1.02 | 179.0573 | C6H12O6           | 0.4  | [M-H] <sup>-</sup> | ↑**   |
| 5   | Acetyl-N-formyl-5-methoxykynurenamine                                                            | 1.25 | 263.1044 | C13H16N2O4        | -1.0 | [M-H] <sup>-</sup> | ↑**   |
| 6   | P-Cresol                                                                                         | 1.42 | 107.0501 | C7H8O             | 0.0  | [M-H] <sup>-</sup> | ↑**   |
| 7   | Azelaic acid                                                                                     | 1.68 | 187.0976 | C9H16O4           | 0.2  | [M-H] <sup>-</sup> | ↑**   |
| 8   | 4-Hydroxybenzaldehyde                                                                            | 1.78 | 121.0297 | C7H6O2            | 1.2  | [M-H] <sup>-</sup> | ↓**   |
| 9   | Testosterone sulfate<br>N-[(3a,5b,7a)-3-<br>Hydroxy-24-oxo-7-(sulfooxy)cholan-24-yl]-<br>glycine | 2.27 | 367.1609 | C19H28O5S         | -0.4 | [M-H] <sup>-</sup> | ↓**   |
| 10  | Hydroxy-24-oxo-7-(sulfooxy)cholan-24-yl]-<br>glycine                                             | 2.3  | 528.2661 | C26H43NO8S        | 0.9  | [M-H] <sup>-</sup> | ↑**   |
| 11  | 2-Phenylethanol glucuronide                                                                      | 2.32 | 299.1160 | C14H18O7          | -2.5 | [M+H] <sup>+</sup> | ↑**   |
| 12  | Murocholic acid                                                                                  | 3.41 | 391.2861 | C24H40O4          | -1.0 | [M-H] <sup>-</sup> | ↑**   |
| 13  | Sphingosine 1-phosphate                                                                          | 3.47 | 378.2409 | C18H38NO5P        | 0.1  | [M-H] <sup>-</sup> | ↑**   |
| 14  | LysoPC(14:0)                                                                                     | 3.53 | 468.3124 | C22H46NO7P        | 0.3  | [M+H] <sup>+</sup> | ↓**   |
| 15  | LysoPC(18:3(6Z,9Z,12Z))                                                                          | 3.57 | 518.3284 | C26H48NO7P        | 1.0  | [M+H] <sup>+</sup> | ↑**   |
| 16  | LysoPC(20:5(5Z,8Z,<br>11Z,14Z,17Z))                                                              | 3.58 | 542.3283 | C28H48NO7P        | 0.7  | [M+H] <sup>+</sup> | ↑**   |
| 17  | LysoPC(18:3(9Z,<br>12Z,15Z))                                                                     | 3.65 | 518.3283 | C26H48NO7P        | 0.1  | [M+H] <sup>+</sup> | ↑**   |
| 18  | LysoPC(16:1(9Z))                                                                                 | 3.74 | 494.3285 | C24H48NO7P        | 0.9  | [M+H] <sup>+</sup> | ↑**   |
| 19  | LysoPC(22:6(4Z,7Z,<br>10Z,13Z,16Z,19Z))                                                          | 3.98 | 568.3453 | C30H50NO7P        | 0.2  | [M+H] <sup>+</sup> | ↑**   |
| 20  | 14,15-Epoxy-5,8,11-<br>eicosatrienoic acid                                                       | 4.41 | 319.2292 | C20H32O3          | 0.0  | [M-H] <sup>-</sup> | ↑**   |
| 21  | LysoPC(20:3(5Z,8Z,11Z))                                                                          | 4.42 | 546.3605 | C28H52NO7P        | 1.5  | [M+H] <sup>+</sup> | ↑**   |
| 22  | LysoPC(16:0)                                                                                     | 4.48 | 496.3446 | C24H50NO7P        | 0.3  | [M+H] <sup>+</sup> | ↑**   |
| 23  | LysoPC(18:1(11Z))                                                                                | 4.54 | 522.3605 | C26H52NO7P        | 0.4  | [M+H] <sup>+</sup> | ↓**   |
| 24  | LysoPC(22:5(7Z,10Z,<br>13Z,16Z,19Z))                                                             | 4.54 | 570.3620 | C30H52NO7P        | 0.4  | [M+H] <sup>+</sup> | ↑**   |
| 25  | LysoPC(P-16:0)                                                                                   | 4.8  | 480.3472 | C24H50NO6P        | 0.0  | [M+H] <sup>+</sup> | ↓**   |
| 26  | LysoPC(22:4(7Z,<br>10Z,13Z,16Z))                                                                 | 4.89 | 572.3764 | C30H54NO7P        | -0.1 | [M+H] <sup>+</sup> | ↑**   |
| 27  | LysoPC(15:0)                                                                                     | 5.96 | 482.3274 | C23H48NO7P        | 0.0  | [M+H] <sup>+</sup> | ↑**   |
| 28  | LysoPC(18:0)                                                                                     | 6.03 | 524.3758 | C26H54NO7P        | 0.8  | [M+H] <sup>+</sup> | ↑**   |
| 29  | LysoPC(P-18:0)                                                                                   | 6.46 | 508.3801 | C26H54NO6P        | -0.1 | [M+H] <sup>+</sup> | ↑**   |
| 30  | Linoleic acid                                                                                    | 7.29 | 279.2345 | C18H32O2          | -0.7 | [M-H] <sup>-</sup> | ↑**   |
| 31  | Maslinic acid                                                                                    | 7.92 | 471.3484 | C30H48O4          | -1.5 | [M-H] <sup>-</sup> | ↓**   |
| 32  | PC(18:0/20:5(5Z,8Z,11Z,14Z,17Z))                                                                 | 8.12 | 808.5867 | C46H82NO8P        | 0.0  | [M+H] <sup>+</sup> | ↑**   |
| 33  | Oleic acid                                                                                       | 8.12 | 281.2499 | C18H34O2          | -0.3 | [M-H] <sup>-</sup> | ↑**   |
| 34  | SM(d18:0/16:1(9Z))                                                                               | 8.28 | 703.5788 | C39H79N2O6P       | -5.0 | [M+H] <sup>+</sup> | ↑**   |
| 35  | PC(18:0/18:4(6Z,9Z,12Z,15Z))                                                                     | 8.52 | 782.5739 | C44H80NO8P        | 0.1  | [M+H] <sup>+</sup> | ↑**   |
| 36  | Chenodeoxycholic acid                                                                            | 8.75 | 393.2999 | C24H40O4          | -0.8 | [M+H] <sup>+</sup> | ↑**   |
| 37  | PE(14:1(9Z)/14:1(9Z))                                                                            | 8.75 | 632.4344 | C33H62NO8P        | -1.1 | [M+H] <sup>+</sup> | ↑**   |

(\*\*: P&lt;0.01)
